# Supplementary material for: Dual Roles of the Lysine-Rich Matrix Protein (KRMP)-3 in Shell Formation of Pearl Oyster, Pinctada fucata
Source: PubMed Central journal article supplement (PMC4498902; doi:10.1371/journal.pone.0131868), 2015-07-10

## Supporting information

**S2 Fig. SEM images of *in vitro* crystallization of calcite in the presence of rKRMP-3, rBR, rGYR at low magnification.** Crystals were grown in the presence of 40  $\mu\text{g/ml}$  GST (A), 40  $\mu\text{g/ml}$  rKRMP-3 (B), 40  $\mu\text{g/ml}$  rBR (C) and 40  $\mu\text{g/ml}$  rGYR (D). Scale bars, 100  $\mu\text{m}$ .

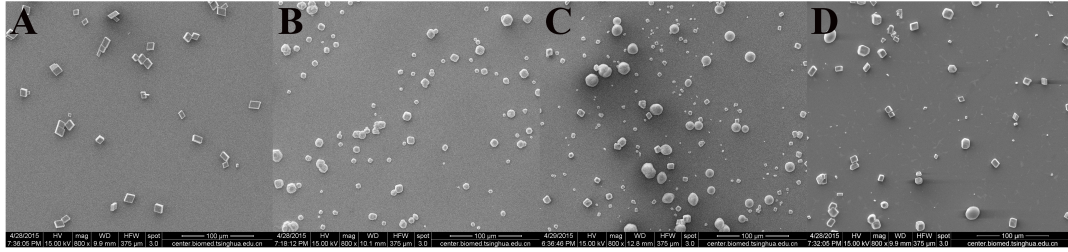

Supplement: pone.0131868.s002.pdf [file pone.0131868.s002.pdf]
